# Supplementary material
Source: publisher site journal article supplement (https://www.dovepress.com/article/328396)
Supplement: Supplementary file 1 [file get_supplementary_file.php]

Supplementary Data 1: Description of study variables and measured items

| **Study Variables** | | **Measured Items** |
| --- | --- | --- |
| Pre-transaction logistics service | Information Quality | IQ_1: The EPSA communication platforms (website, viber group or telegram group) provide the most current information  IQ_2: The information about the products or services is complete  IQ_3: The information about the products/services is adequate |
| IQ_4: The information about the products/services is accurate |
| IQ_5: The information about the products/services is credible |
| Ordering procedures | OP_1: Requisitioning procedures are effective |
| OP_2: Requisitioning procedures are convenient |
| OP_3: Requisitioning procedures are flexible (can be sent online) |
| OP_4: Requisitioning procedures are easy |
| Personnel Contact Quality | PCQ_1: Distribution officer makes an effort to understand your needs |
| PCQ_2: The officer has adequate knowledge to handle your request |
| PCQ_3: The officer has required experience to process your request  PCQ_4: The employees show real interest in solving a problem when you have |
| During-transaction logistics service | Product availability | PA_1: Ordered products are available in the inventory |
| PA_2: Ordered quantities are not challenged due to stock shortages |
| PA_3: Ordered quantities are not challenged due to maximum release quantity |
| PA_4: You get notified when a product is stocked-out |
| Order Condition | OC_1: Products received after order placement are undamaged  OC_2: Orders are packaged conveniently  OC_3: Damages rarely occur as a result of the transportation |
| Timeliness | T_1: Ordering and receiving is provided at an appropriate timeframe |
| T_2: Deliveries reach on the date promised |
| T_3: The agency gives timely response for emergency/urgent orders |
| Post-transaction logistics service | Order accuracy | OA_1: The products requested delivered, not unordered products |
| OA_2: The products delivered rarely contain the substituted item |
| OA_3: The products delivered rarely contain incorrect quantity  OA_4: The Invoices (cash or credit) matches with orders delivered |
| Order discrepancy Handling | ODH_1: In a case discrepancy occurred, item return is accepted |
| ODH_2: Store manager willingly provides exchanges to be replaced |
| ODH_3: Correction of delivered quality discrepancy is satisfactory |
| ODH_4: Response to quality discrepancy report is satisfactory |
| Compliant Handling | CH_1: The employees are willing to listen to a customer complaint |
| CH_2: The office/help desk is accessible to handle your complaint |
| CH_3: The agency is willing to respond to your complaint  CH_4: The agency gives a quick response to your complaint |
| Customer Satisfaction | | CSat_1: How satisfied are you with the EPSA logistics customer services before the actual transaction takes place? |
| CSat_2: How satisfied are you with the logistics customer services during the actual transaction stage of EPSA? |
| CSat_3: How satisfied are you with the EPSA logistics customer services after delivery has taken place? |
| CSat_4: As per your experiences and perceptions, which word best describes your feelings toward EPSA? |
| CSat_5: Overall, how satisfied with the EPSA logistics customer service quality? |
